# Supplementary material for: Gene signatures and prognostic values of m6A regulators in clear cell renal cell carcinoma – a retrospective study using TCGA database
Source: publisher site journal article supplement (doi:10.18632/aging.101856), 2019-03-15
Supplement: Supplementary file [file aging-v11i6-101856-supplementary-material-SD1.pdf]

SUPPLEMENTARY MATERIAL

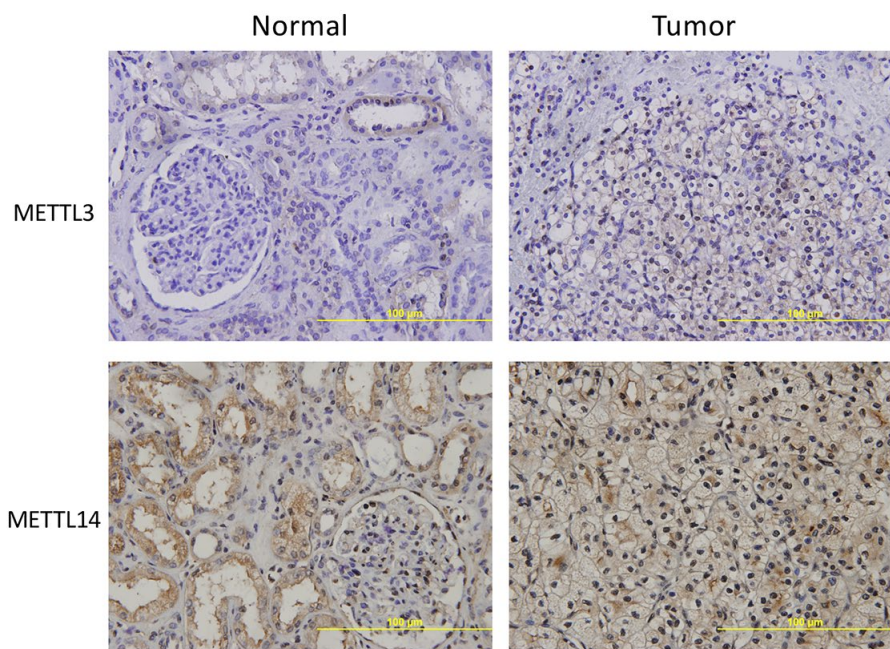

Figure S1. The protein expression of METTL3 and METTL14 in ccRCC and normal kidney tissues.

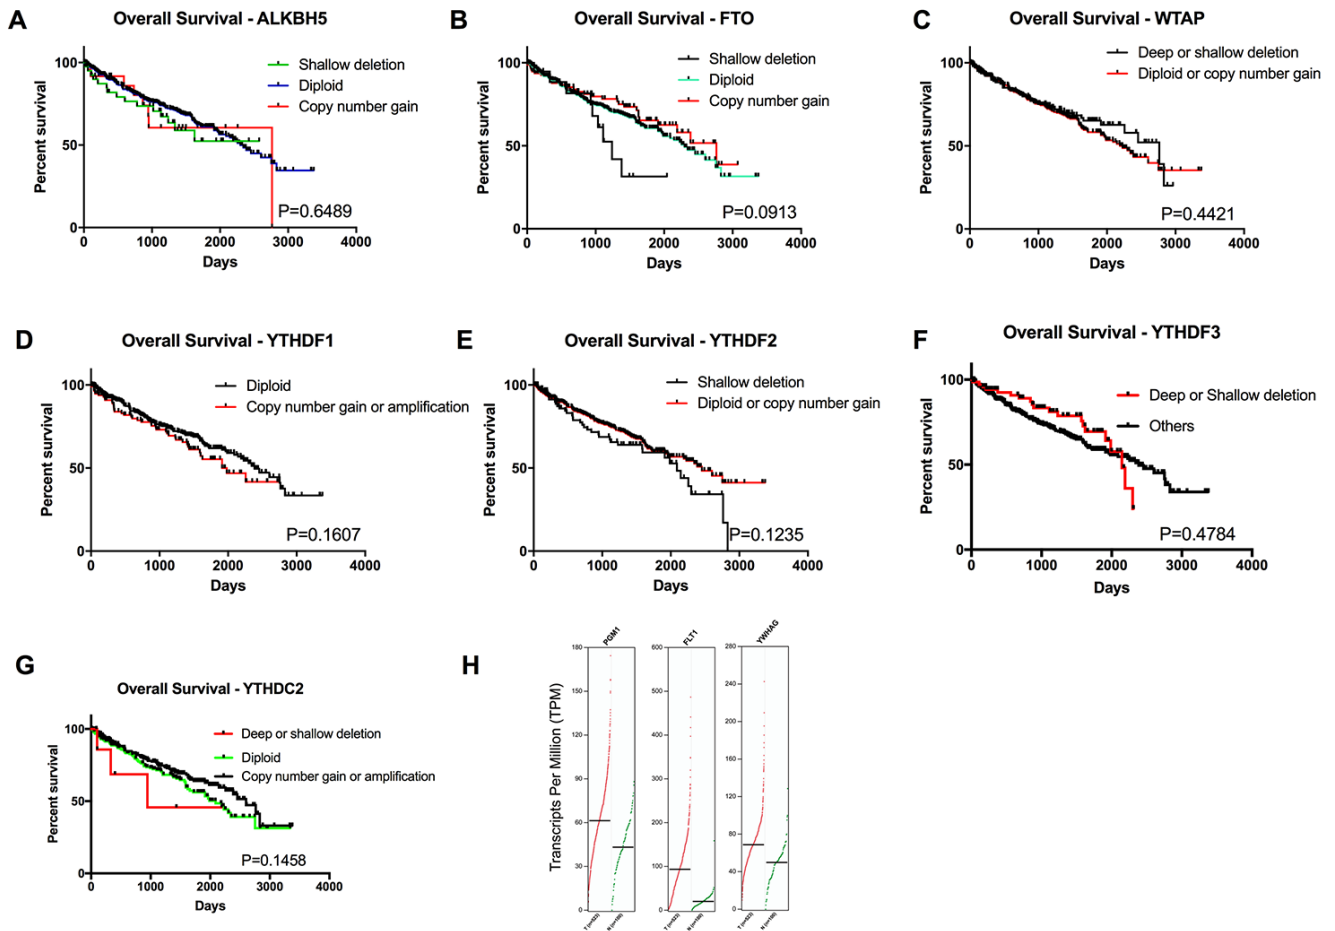

**Figure S2.** (A-G) OS of ccRCC patients with different alterations of m6A regulatory genes ALKBH5, FTO, WTAP, YTHDF1, YTHDF2, YTHDF3 and YTHDC2. (H) Expression of genes related to adipogenesis and mTORC1 signaling pathways in ccRCC tissues.
